# Supplementary material
Source: publisher figshare collection journal article supplement (https://gsajournals.figshare.com/ndownloader/files/13867622)
Supplement: Supplementary file 1 [file 13867622]

==================================================
file name: L_RNA_scaffolder.1kb.fasta.nocontamination.noPhiX.fasta
sequences:         97072
total length:  262264350 bp  (257522616 bp excl N/X-runs)
GC level:         33.99 %
bases masked:   76816789 bp ( 29.29 %)
==================================================
               number of      length   percentage
               elements*    occupied  of sequence
--------------------------------------------------
SINEs:                0            0 bp    0.00 %
      ALUs            0            0 bp    0.00 %
      MIRs            0            0 bp    0.00 %

LINEs:             1506      1082413 bp    0.41 %
      LINE1         180       110608 bp    0.04 %
      LINE2           0            0 bp    0.00 %
      L3/CR1          0            0 bp    0.00 %

LTR elements:      3351      2083492 bp    0.79 %
      ERVL            0            0 bp    0.00 %
      ERVL-MaLRs      0            0 bp    0.00 %
      ERV_classI      0            0 bp    0.00 %
      ERV_classII     0            0 bp    0.00 %

DNA elements:       502       253878 bp    0.10 %
     hAT-Charlie      0            0 bp    0.00 %
     TcMar-Tigger     0            0 bp    0.00 %

Unclassified:    590601     69022514 bp   26.32 %

Total interspersed repeats: 72442297 bp   27.62 %


Small RNA:            0            0 bp    0.00 %

Satellites:           0            0 bp    0.00 %
Simple repeats:   65714      3545818 bp    1.35 %
Low complexity:   14237      1065407 bp    0.41 %
==================================================

* most repeats fragmented by insertions or deletions
  have been counted as one element
                                                      

The query species was assumed to be homo          
RepeatMasker Combined Database: Dfam_Consensus-20170127
                          
run with rmblastn version 2.6.0+
The query was compared to classified sequences in "Repeatmodeler_Apocyclops_royi_Repbase_merged.fasta"
